# Supplementary material for: Real-time monitoring of peroxiredoxin oligomerization dynamics in living cells
Source: PubMed Central journal article supplement — Proc Natl Acad Sci U S A. 2020 Jun 29;117(28):16313–23. doi: 10.1073/pnas.1915275117 (PMC7368258; doi:10.1073/pnas.1915275117), 2020-06-29
Supplement: pnas.1915275117.sapp.pdf [file pnas.1915275117.sapp.pdf]

**Supporting information appendix for**

**Real-time monitoring of peroxiredoxin oligomerization dynamics in living cells**

Daniel Pastor-Flores<sup>1,#</sup>, Deepti Talwar<sup>1,2,#</sup>, Brandán Pedre<sup>1</sup> and Tobias P. Dick<sup>1,\*</sup>

<sup>1</sup>Division of Redox Regulation, DKFZ-ZMBH Alliance, German Cancer Research Center (DKFZ), Im Neuenheimer Feld 280, 69120 Heidelberg, Germany

<sup>2</sup>Faculty of Biosciences, Heidelberg University, 69120 Heidelberg, Germany

#these authors contributed equally

\*Correspondence: [t.dick@dkfz.de](mailto:t.dick@dkfz.de) (T.P.D.)

## Supplementary methods

### Ferrous oxidation of xylenol orange (FOX) assay

Reduced Prx2 or mCER-Prx2 (40  $\mu\text{M}$ ) was mixed with 40  $\mu\text{M}$   $\text{H}_2\text{O}_2$  in 20 mM Tris-HCl, pH 7.4, 150 mM NaCl at 25°C. After 15, 30, 60 and 300 seconds of reaction, 10  $\mu\text{L}$  of the reaction was mixed with 490  $\mu\text{L}$  of the FOX assay reaction mix (100  $\mu\text{M}$  xylenol orange, 250  $\mu\text{M}$  ammonium ferrous sulfate, 100 mM sorbitol and 25 mM  $\text{H}_2\text{SO}_4$ ), and incubated for 30 min at room temperature in darkness. At the end of the reaction, absorbance at 560 nm was measured, and the  $\text{H}_2\text{O}_2$  concentration was calculated based on a  $\text{H}_2\text{O}_2$  standard curve.

### Thioredoxin/thioredoxin reductase/NADPH-coupled assay of Prx2 and mCER-Prx2 variants

The assay was done as described in (1), with the following modifications: the assay was performed in an Omega plate reader (BMG Labtech) at 30°C and 250  $\mu\text{L}$  final volume, and contained 200  $\mu\text{M}$  NADPH, 2  $\mu\text{M}$  thioredoxin reductase (TrxR) from *Corynebacterium glutamicum* (2), 10  $\mu\text{M}$  thioredoxin from *E. coli* (3) and 200  $\mu\text{M}$   $\text{H}_2\text{O}_2$ . After 3 minutes of pre-incubation time, 0.5  $\mu\text{M}$  of peroxiredoxin was added to initiate the reaction. The  $\text{H}_2\text{O}_2$  reduction coupled to NADPH oxidation ( $\Delta\epsilon_{340} = 6220 \text{ M}^{-1} \text{ cm}^{-1}$ ) was measured by following the decrease in absorption at 340 nm. The path length was autocorrected with the Omega plate reader software.

### In vitro plate reader polarization measurements

For measuring the concentration dependence of fluorescence polarization as facilitated by purified mCER-Prx2 and mCER-Prx2(C51S), 13 dilutions were prepared (5  $\mu\text{M}$ , 3  $\mu\text{M}$ , 1.98  $\mu\text{M}$ , 1.31  $\mu\text{M}$ , 0.86  $\mu\text{M}$ , 0.57  $\mu\text{M}$ , 0.38  $\mu\text{M}$ , 0.25  $\mu\text{M}$ , 0.16  $\mu\text{M}$ , 0.11  $\mu\text{M}$ , 0.07  $\mu\text{M}$ , 0.05  $\mu\text{M}$ , 0.031  $\mu\text{M}$ ). The proteins were diluted in 20 mM Tris-HCl (pH 7.5), 150 mM NaCl and 10 mM dithiothreitol (DTT) in a final volume of 20  $\mu\text{L}$ . The mixture was incubated for 10 min and then measured in a black/clear 384-well plate (BD Falcon) using the PHERAstar FS microplate reader (BMG Labtech) equipped with a fluorescence polarization filter, excitation at 430 nm and emission at 480 nm. 500mP of polarization with a gain of 50% were used to adjust the initial measurement to the well containing 8  $\mu\text{M}$  of mCER-Prx2. Polarization was calculated using MARS data analysis software (BMG Labtech) according to the following equation:

$$[(I_{\parallel} - G \times I_{\perp}) / (I_{\parallel} + G \times I_{\perp})] \times 1000 = \text{mP}$$

The G factor (compensation factor for the plate reader) was set automatically for each measurement based on gain adjustment settings.

## Supplementary table

**Table 1. Primers used for mutagenesis of mCER-Prx2 or roGFP2-Prx2**

| Mutation          | Primer (5'-3')                                 |
|-------------------|------------------------------------------------|
| C172S Forward     | GGGGAAGTTTCTCCCGCTGGC                          |
| C172S Reverse     | ATGCTCGTCTGTGTACTGG                            |
| C51S Forward      | ACTTTTGTGTCCCCACCGAG                           |
| C51S Reverse      | GAAGTCCAGAGGGTAGAAAAAG                         |
| A82E,T85E Forward | CGGGGGGTGTTGATCCACTCCAGGTGCTCGAACTGAGAGTCCACCG |
| A82E,T85E Reverse | CGGTGGACTCTCAGTTCGAGCACCTGGAGTGGATCAACACCCCCCG |
| S76D Forward      | GTGAAGTGCTGGGCGTCGACGTGGACTCTCAGTTCAC          |
| S76D Reverse      | GTGAACTGAGAGTCCACGTCGACGCCAGCACTTCAC           |
| C172A Forward     | GCCAGCGGGAGCAACTTCCCCATGCTCGTCT                |
| C172A Reverse     | AGACGAGCATGGGGAAGTTGCTCCCGCTGGC                |

## Supplementary Figure 1

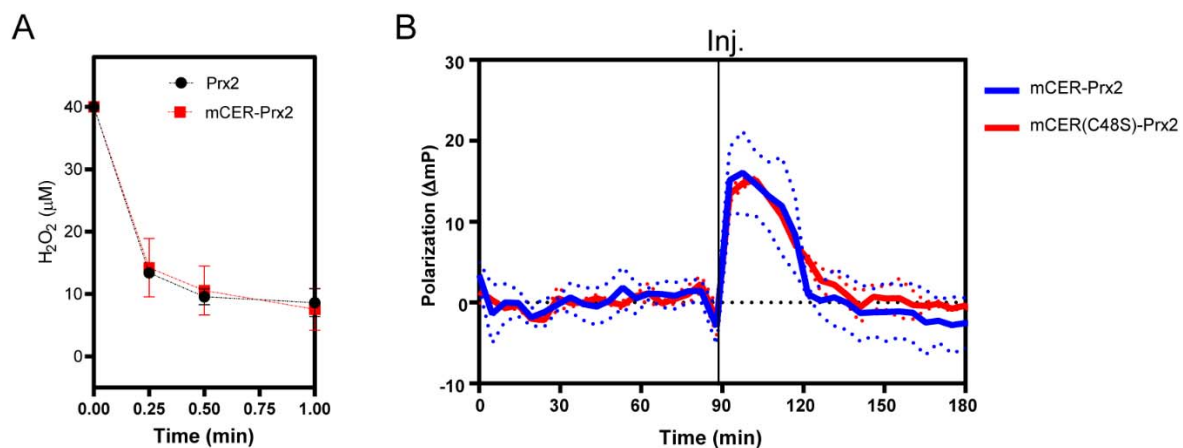

(A) Recombinant Prx2 and mCER-Prx2 do not differ in H<sub>2</sub>O<sub>2</sub> reactivity. Purified Prx2 and mCER-Prx2 (40 μM) were incubated with an equimolar amount of H<sub>2</sub>O<sub>2</sub>. The remaining concentration of H<sub>2</sub>O<sub>2</sub> was determined with the FOX assay at the indicated time points. Based on 3 biological replicates.

(B) The surface exposed cysteine Cys-48 of mCER does not affect the probe response. Comparison of the polarization change induced by H<sub>2</sub>O<sub>2</sub> (100 μM) in cells expressing either mCER-Prx2 or mCER(C48S)-Prx2. Based on 3 biological replicates with 6 technical replicates each.

## Supplementary Figure 2

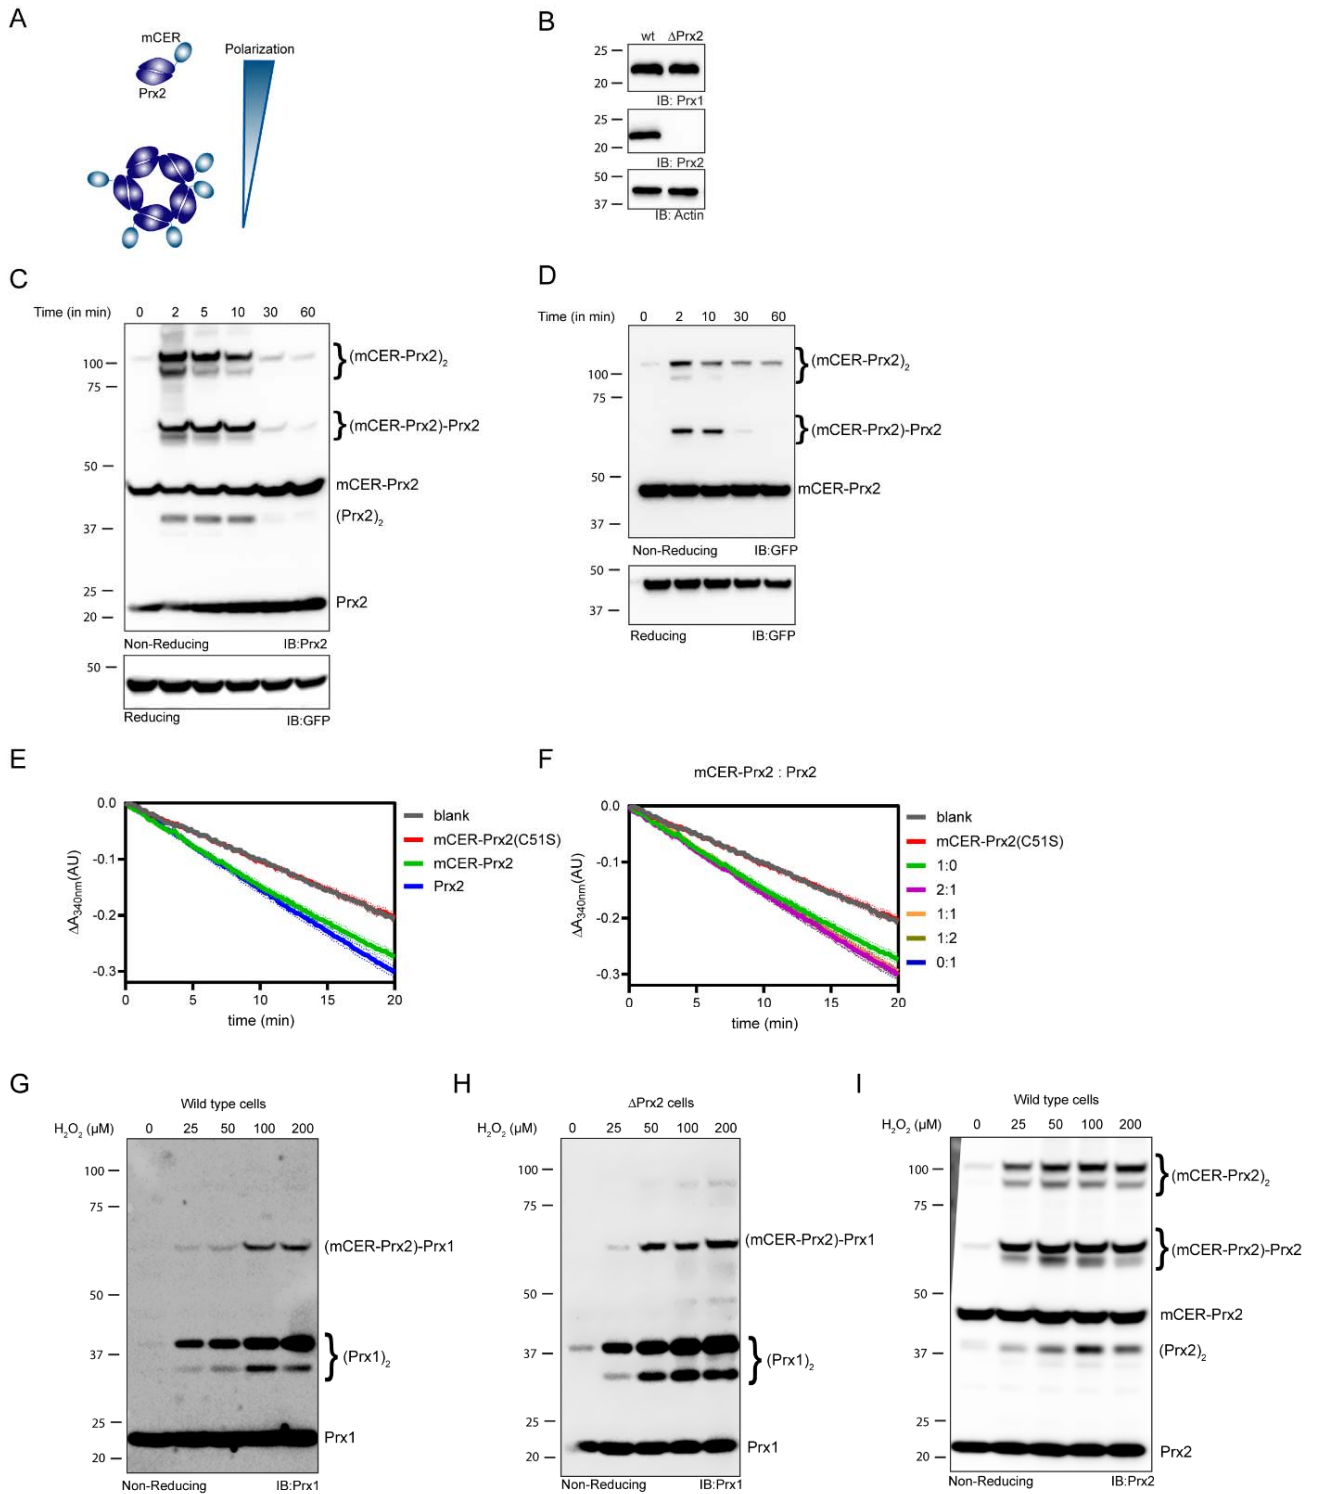

(A) Schematic depiction of fluorophore crowding in dimers vs. decamers. Assuming a mCER-Prx2:Prx2 molar ratio of 1:1, the average dimer will carry one fluorophore and the average decamer five fluorophores. The crowding of fluorophores in the decamer supports energy transfer and hence fluorescence depolarization.

(B) Immunoblot confirming the lack of Prx2 protein expression in the Prx2 KO ( $\Delta$ Prx2) HEK293 cell line.

(C) Time course following a 100  $\mu$ M H<sub>2</sub>O<sub>2</sub> bolus treatment of HEK293 cells stably expressing mCER-Prx2, analyzed by anti-Prx2 immunoblotting. (mCER-Prx2)<sub>2</sub> and (Prx2)<sub>2</sub> indicate the respective covalent (disulfide-linked) homodimers, and (mCER-Prx2)-Prx2 indicates the corresponding covalent (disulfide-linked) heterodimer.

(D) Time course following a 100  $\mu$ M H<sub>2</sub>O<sub>2</sub> bolus treatment of HEK293 cells stably expressing mCER-Prx2, analyzed by anti-GFP immunoblotting.

(E) Comparison of Prx2 and mCER-Prx2 activity coupled to the thioredoxin/thioredoxin reductase/NADPH system. The decrease in A<sub>340</sub>, reflecting NADPH oxidation, was monitored after the addition of Prx2 or mCER-Prx2 to the reaction mixture, containing thioredoxin, thioredoxin reductase, NADPH and H<sub>2</sub>O<sub>2</sub>. The mCER-Prx2(C51S) protein was used as a negative control. Based on three replicates.

(F) Mixtures of Prx2 and mCER-Prx2 (yielding heterodimers) exhibit a peroxidatic activity not significantly different from Prx2 peroxidatic activity. The decrease in A<sub>340</sub>, reflecting NADPH oxidation, was monitored after the addition of Prx2 or mCER-Prx2 to the reaction mixture, containing thioredoxin, thioredoxin reductase, NADPH and H<sub>2</sub>O<sub>2</sub>. The mCER-Prx2(C51S) protein was used as a negative control. Based on three replicates.

(G) Detection of (mCER-Prx2)-Prx1 disulfide-linked heterodimers in Prx2-proficient cells, 2 min after H<sub>2</sub>O<sub>2</sub> treatment, analyzed by anti-Prx1 immunoblotting.

(H) Detection of (mCER-Prx2)-Prx1 disulfide-linked heterodimers in Prx2-deficient (Prx2-KO) cells, 2 min after H<sub>2</sub>O<sub>2</sub> treatment, analyzed by anti-Prx1 immunoblotting.

(I) The same experiment as in (G), analyzed by anti-Prx2 immunoblotting.

All immunoblots in this figure are representative of 3 replicates.

### Supplementary Figure 3

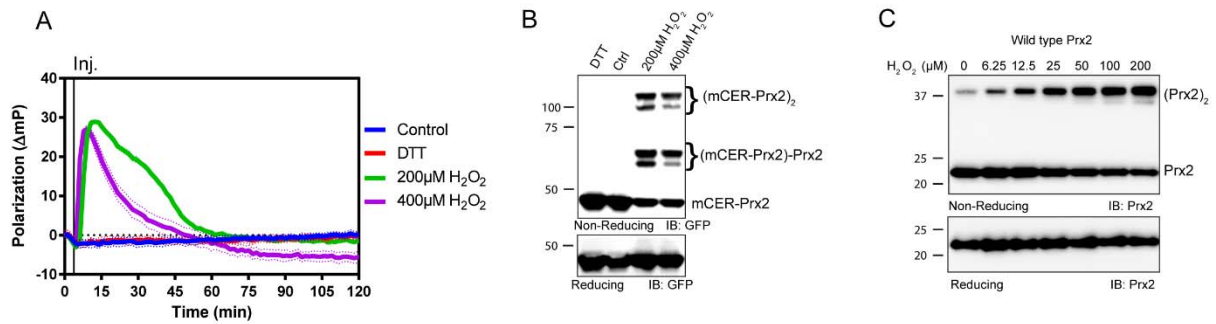

(A) Maximal polarization is reached at 200  $\mu$ M H<sub>2</sub>O<sub>2</sub>, as shown by comparison with a 400  $\mu$ M H<sub>2</sub>O<sub>2</sub> treatment. The response at 400  $\mu$ M is affected by hyperoxidation, as explained in the main text. Based on 3 biological replicates with 6 technical replicates each.

(B) Maximal disulfide-linked dimer formation is reached at 200  $\mu$ M H<sub>2</sub>O<sub>2</sub>, as shown by anti-GFP immunoblotting using the same cells as in (A), 2 min after H<sub>2</sub>O<sub>2</sub> exposure. Representative of 3 replicates.

(C) Covalent dimerization of endogenous Prx2 in HEK293 cells in the absence of mCER-Prx2, 2 min after H<sub>2</sub>O<sub>2</sub> exposure. Representative of 3 replicates.

## Supplementary Figure 4

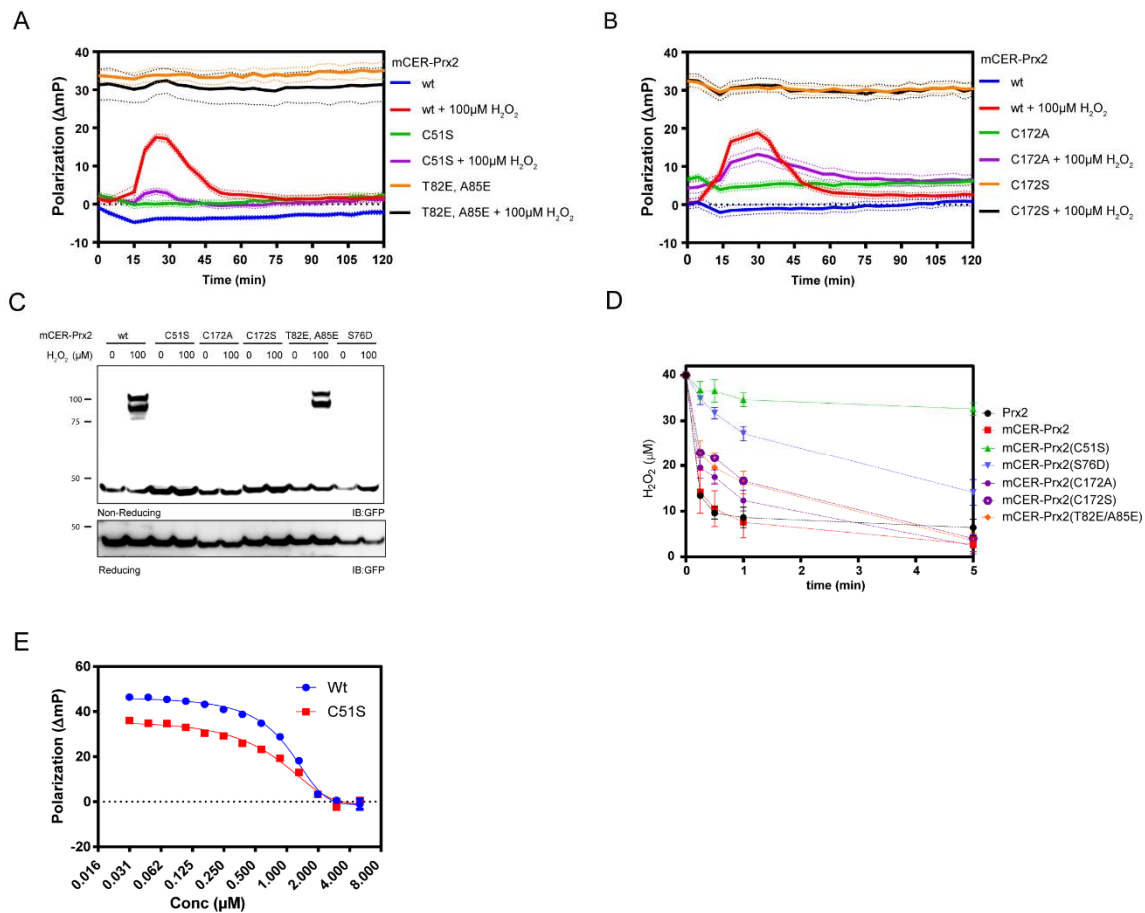

(A) Fluorescence polarization response facilitated by mCER-Prx2, mCER-Prx2(C51S) and mCER-Prx2(T82E/A85E). Based on 3 biological replicates with 6 technical replicates each.

(B) Fluorescence polarization response facilitated by mCER-Prx2, mCER-Prx2(C172A) and mCER-Prx2(C172S). Based on 3 biological replicates with 6 technical replicates each.

(C) mCER-Prx2 and mCER-Prx2(T82E/A85E), but not the other mutants, form covalent homodimers upon H<sub>2</sub>O<sub>2</sub> exposure. Cells transiently expressing the indicated mCER-Prx2 mutants were analyzed by anti-GFP immunoblotting. Representative of 3 replicates.

(D) H<sub>2</sub>O<sub>2</sub> reduction kinetics for Prx2, mCER-Prx2 and corresponding mutants. Purified proteins (40 μM) were incubated with an equimolar amount of H<sub>2</sub>O<sub>2</sub>, and the remaining concentration of H<sub>2</sub>O<sub>2</sub> was measured at the indicated time points with the FOX assay. Based on 3 biological replicates.

(E) Fluorescence polarization facilitated by recombinant mCER-Prx2 and mCER-Prx2(C51S) proteins at concentrations between 0.031 and 5 μM. Based on 3 biological replicates.



## Supplementary references

1. Nelson KJ & Parsonage D (2011) Measurement of peroxiredoxin activity. *Curr Protoc Toxicol* Chapter 7:Unit7 10.
2. Ordonez E, *et al.* (2009) Arsenate reductase, mycothiol, and mycoredoxin concert thiol/disulfide exchange. *J Biol Chem* 284(22):15107-15116.
3. El Hajjaji H, *et al.* (2009) The zinc center influences the redox and thermodynamic properties of Escherichia coli thioredoxin 2. *J Mol Biol* 386(1):60-71.
